# Supplementary material for: Highly selective, naked-eye and fluorescent “off-on” probe for detection of histidine/histidine-rich proteins and its application in living cell imaging
Source: Royal Society of Chemistry journal article supplement (doi:10.1039/c2ob06520g), 2012-01-01
Supplement: c2ob06520g.pdf [file c2ob06520g.pdf]

## *Supporting Information*

# **Highly selective, naked-eye and fluorescent “off-on” probe for detection of histidine/histidine-rich protein and its application in living cell imaging**

Shenyi Zhang, Chunmei Yang, Weiping Zhu, Bubing Zeng, Youjun Yang, Yufang Xu\*, Xuhong Qian\*

*State Key Laboratory of Bioreactor Engineering, Shanghai Key Laboratory of Chemical Biology, School of Pharmacy East China University of Science and Technology Meilong Road 130, Shanghai, 200237 (China). Fax: (+86) 21-64252603*

*E-mail: yfxu@ecust.edu.cn, xhqian@ecust.edu.cn*

## **Contents:**

|                                                                                       |       |
|---------------------------------------------------------------------------------------|-------|
| 1. The fluorescent Spectra of <b>M2</b> with Cu(II) addition.....                     | S2    |
| 2. Determination of the association constant $K_s$ .....                              | S2    |
| 3. The FTIR spectras of compounds <b>3</b> , <b>2</b> , <b>M2</b> and <b>S1</b> ..... | S3-S4 |
| 4. The HRMS spectra of compound <b>M2</b> .....                                       | S5    |
| 5. The HRMS spectra of compound <b>S1</b> .....                                       | S5    |

## 1. The fluorescent Spectra of M2 with Cu(II) addition

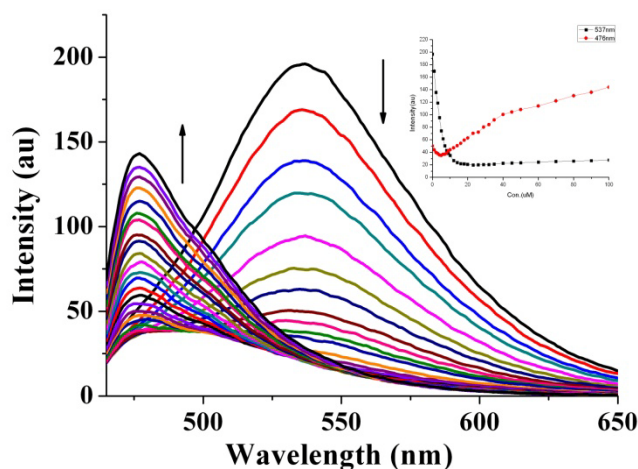

**Fig S1.** The fluorescent influence of **M2** (10  $\mu\text{M}$ ) in the presence of increasing  $\text{Cu}^{2+}$  concentration (0 – 100  $\mu\text{M}$ ) in EtOH-buffer solution (40/60, v/v, 50 mM HEPES, pH 7.2).

## 2. Determination of the association constant $K_s$

The association constant ( $K_s$ , Formation of a 1:1 complex) was determined by a nonlinear least-squares analysis of  $I$  versus  $\text{CM}$  using the following equation:

$$Y = Y_0 + \frac{Y_{\text{lim}} - Y_0}{2} \left\{ 1 + \frac{C_M}{C_L} + \frac{1}{K_s C_L} - \left[ \left( 1 + \frac{C_M}{C_L} + \frac{1}{K_s C_L} \right)^2 - 4 \frac{C_M}{C_L} \right]^{1/2} \right\}$$

Where  $Y$  is the fluorescent intensity (or fluorescent intensity ratio);  $C_M$  is the concentration of additional compounds;  $C_L$  is the concentration of probe.

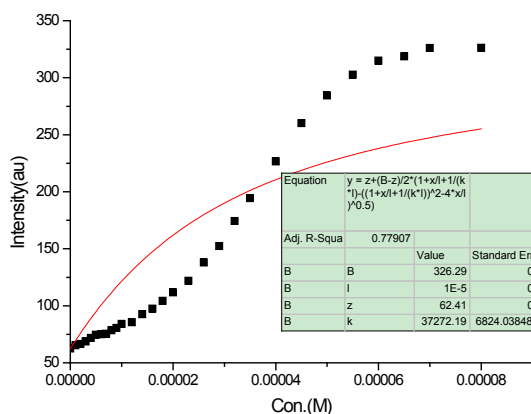

**Fig. S2.** The fitting curve of fluorescence intensity of **S1** versus increasing concentrations of histidine in EtOH-water solution (60:40, v/v, 50 mM HEPES buffer, pH 7.2). The concentration of **S1** was 10  $\mu\text{M}$ .

### 3. The FTIR spectras of compounds 3, 2, M2 and S1

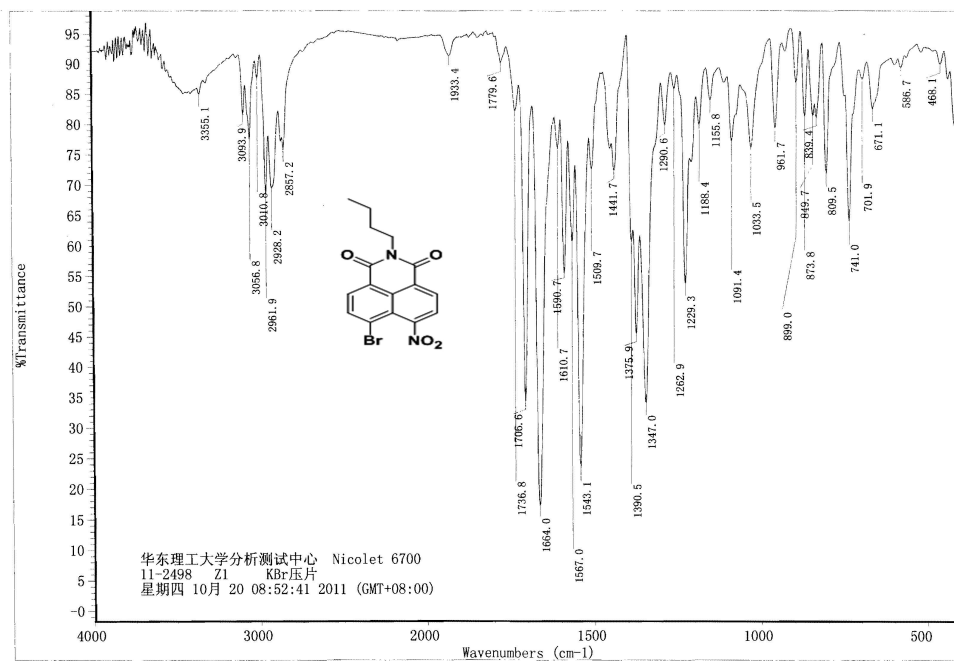

Fig. S3 The FTIR spectra of compound 3

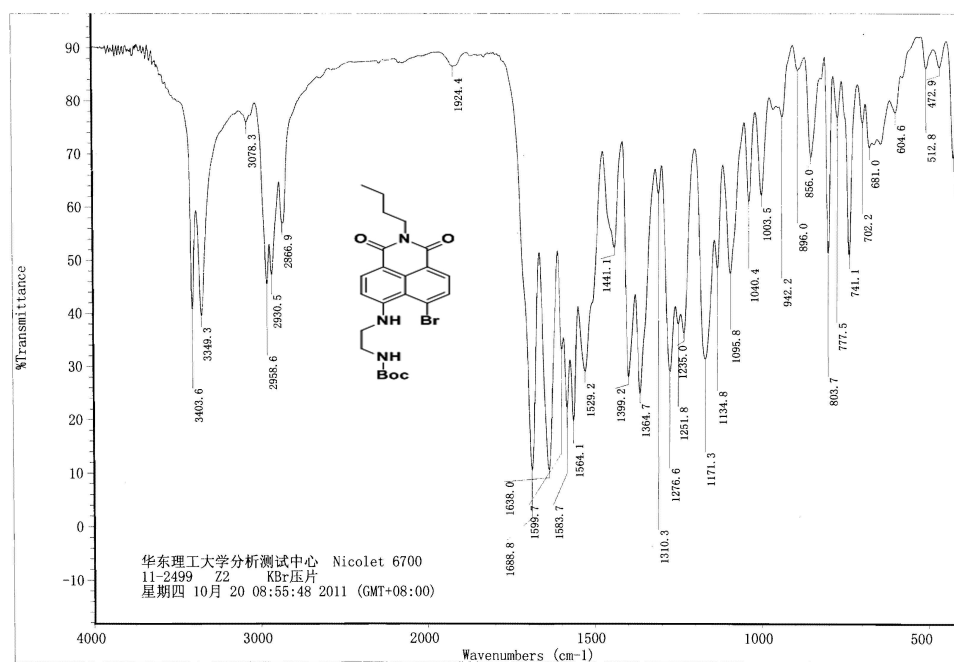

Fig. S4 The FTIR spectra of compound 2

Supplementary Material (ESI) for Organic & Biomolecular Chemistry  
This journal is (c) The Royal Society of Chemistry 2011

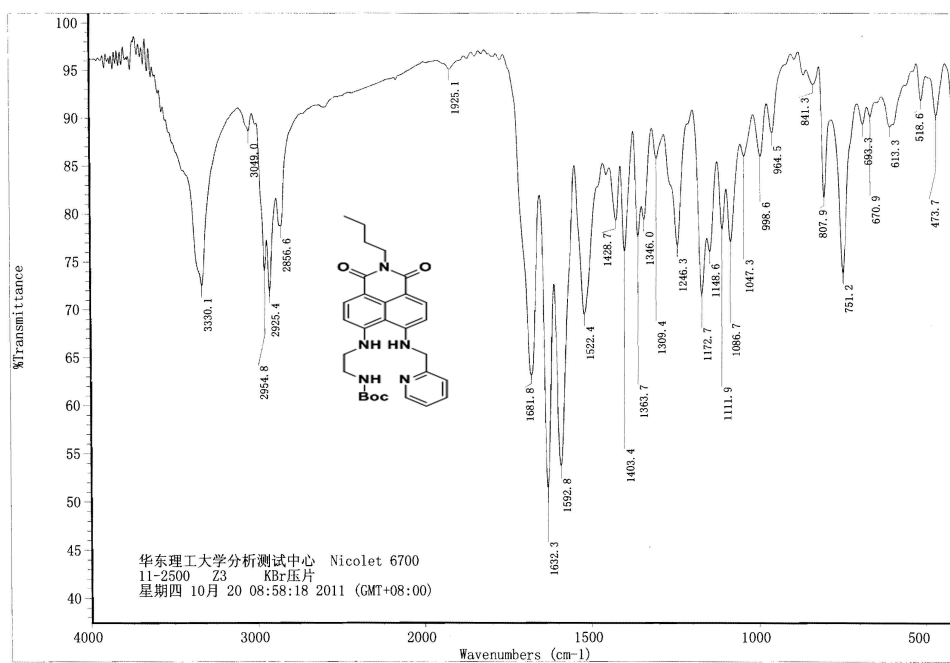

Fig. S5 The FTIR spectra of compound M2

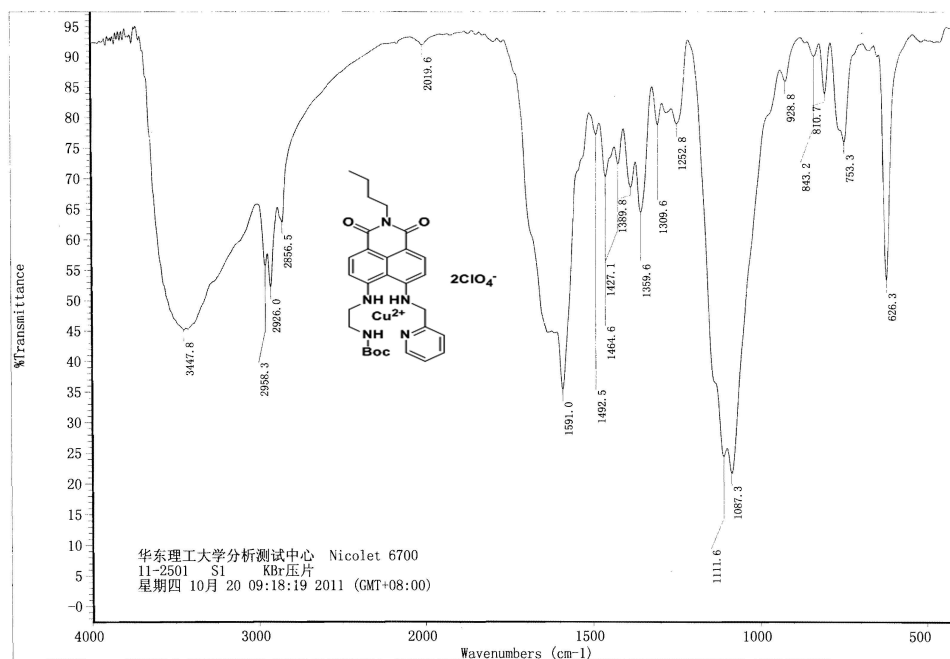

Fig. S6 The FTIR spectra of compound S1

#### 4. The HRMS spectra of compound M2

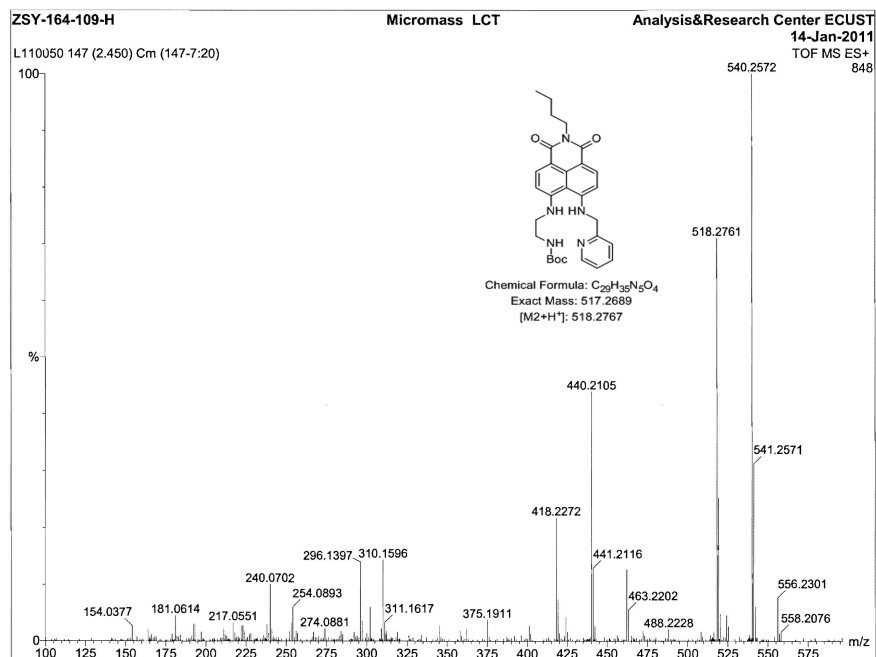

Fig. S7 The HRMS spectra of compound M2

#### 5. The HRMS spectra of compound S1

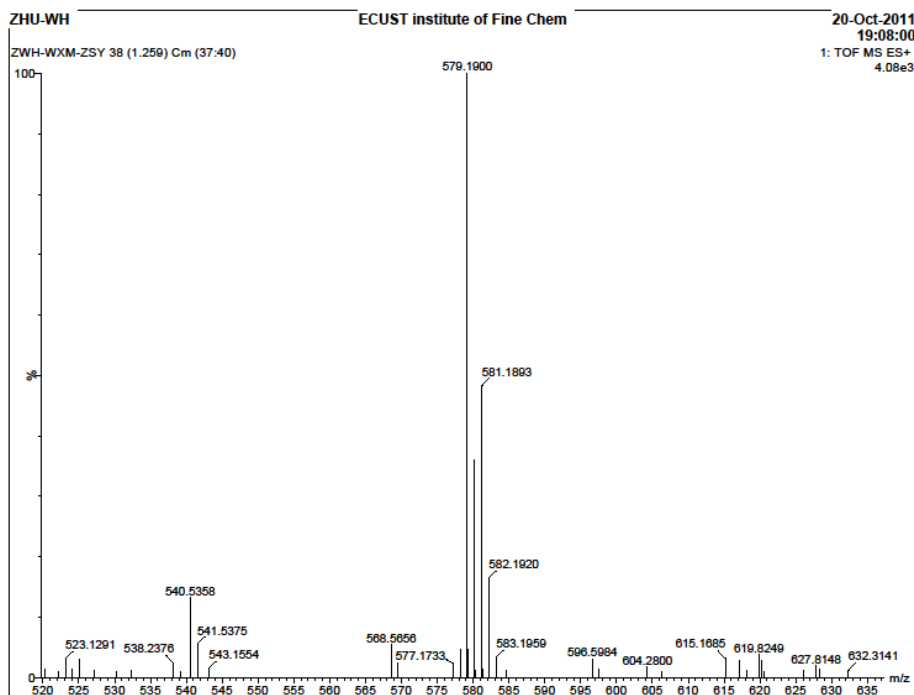

Fig. S8 The HRMS spectra of compound S1
